# Supplementary material
Source: PubMed Central journal article supplement (PMC7594384)

**Supplemental Table 1.** 5 year-outcomes of patients with or without MRD at EO11 or at EO12**All patients**

|                                            | MRD- at EO11 (n=544) |              | MRD+ at EO11 (n=240) |              | MRD- vs. MRD+ |
|--------------------------------------------|----------------------|--------------|----------------------|--------------|---------------|
|                                            | N                    | % ± 2SE%     | N                    | % ± 2SE%     | P             |
| 5yr OS from end of induction 1 (Course 1)  | 544                  | 72.9% ± 3.9% | 240                  | 48.2% ± 6.6% | <0.001        |
| 5yr DFS from end of induction 1 (Course 1) | 544                  | 57.2% ± 4.3% | 240                  | 30.5% ± 6.1% | <0.001        |
| 5yr RR from end of induction 1 (Course 1)  | 544                  | 38.6% ± 4.2% | 240                  | 61.3% ± 6.4% | <0.001        |
| 5yr TRM from end of induction 1 (Course 1) | 544                  | 4.3% ± 1.7%  | 240                  | 8.2% ± 3.6%  | 0.028         |

**All patients**

|                                            | MRD- at EO12 (n=544) |              | MRD+ at EO12 (n=121) |              | MRD- vs. MRD+ |
|--------------------------------------------|----------------------|--------------|----------------------|--------------|---------------|
|                                            | N                    | % ± 2SE%     | N                    | % ± 2SE%     | P             |
| 5yr OS from end of induction 1 (Course 2)  | 544                  | 72.2% ± 3.9% | 121                  | 45.7% ± 9.2% | <0.001        |
| 5yr DFS from end of induction 1 (Course 2) | 544                  | 59.4% ± 4.3% | 121                  | 23.1% ± 7.8% | <0.001        |
| 5yr RR from end of induction 1 (Course 2)  | 544                  | 36.5% ± 4.2% | 121                  | 71.9% ± 8.3% | <0.001        |
| 5yr TRM from end of induction 1 (Course 2) | 544                  | 4.1% ± 1.7%  | 121                  | 5.0% ± 4.0%  | 0.614         |

**Supplemental Table 2** Demographic, laboratory, and clinical characteristics of patients with or without MRD at the EO12.

| Characteristic                        | End of Induction 2 MRD status |                |                      |                |                  |
|---------------------------------------|-------------------------------|----------------|----------------------|----------------|------------------|
|                                       | MRD- at EO12 (n=544)          |                | MRD+ at EO12 (n=121) |                | P                |
|                                       | N                             | %              | N                    | %              |                  |
| <b>Total</b>                          | 544                           |                | 121                  |                |                  |
| Gender                                |                               |                |                      |                |                  |
| Male                                  | 257                           | 47.2%          | 64                   | 52.9%          | 0.261            |
| Female                                | 287                           | 52.8%          | 57                   | 47.1%          |                  |
| Age Group                             |                               |                |                      |                |                  |
| 0-1 year                              | 101                           | 18.6%          | 22                   | 18.2%          | 0.922            |
| 2-10 year                             | 205                           | 37.7%          | 41                   | 33.9%          | 0.434            |
| >11 year                              | 238                           | 43.8%          | 58                   | 47.9%          | 0.402            |
| Cytogenetics                          |                               |                |                      |                |                  |
| Normal                                | 77                            | 18.8%          | 52                   | 31.5%          | <b>0.001</b>     |
| t(8;21)                               | 75                            | 18.3%          | 14                   | 8.5%           | <b>0.003</b>     |
| inv(16)                               | 62                            | 15.2%          | 7                    | 4.2%           | <b>&lt;0.001</b> |
| t(9;11)/11q23                         | 94                            | 23.0%          | 24                   | 14.5%          | <b>0.024</b>     |
| t(6;9)                                | 5                             | 1.2%           | 5                    | 3.0%           | 0.160            |
| Monosomy 7                            | 3                             | 0.7%           | 6                    | 3.6%           | <b>0.020</b>     |
| Del(7q)                               | 1                             | 0.2%           | 5                    | 3.0%           | <b>0.009</b>     |
| -5/5q                                 | 7                             | 1.7%           | 3                    | 1.8%           | 1.000            |
| +8                                    | 19                            | 4.6%           | 19                   | 11.5%          | <b>0.003</b>     |
| Other                                 | 66                            | 16.1%          | 30                   | 18.2%          | 0.552            |
| Unknown                               | 12                            |                | 3                    |                |                  |
| ITD status                            |                               |                |                      |                |                  |
| Negative                              | 462                           | 89.0%          | 75                   | 67.0%          | <b>&lt;0.001</b> |
| Positive                              | 61                            | 11.8%          | 37                   | 33.0%          |                  |
| <i>High Allelic Ratio</i>             | 31                            | 5.9%           | 22                   | 19.6%          |                  |
| <i>Low Allelic Ratio</i>              | 30                            | 5.7%           | 15                   | 13.4%          |                  |
| Unknown                               | 21                            |                | 9                    |                |                  |
| CEBPA status                          |                               |                |                      |                |                  |
| Negative                              | 486                           | 93.6%          | 112                  | 100.0%         | <b>0.006</b>     |
| Positive                              | 33                            | 6.4%           | 0                    | 0.0%           |                  |
| Unknown                               | 25                            |                | 9                    |                |                  |
| NPM status                            |                               |                |                      |                |                  |
| Negative                              | 475                           | 91.3%          | 104                  | 92.9%          | 0.601            |
| Positive                              | 45                            | 8.7%           | 8                    | 7.1%           |                  |
| Unknown                               | 24                            |                | 9                    |                |                  |
| Risk group (cyto/mutation)            |                               |                |                      |                |                  |
| Standard                              | 258                           | 48.4%          | 78                   | 65.5%          | <b>0.001</b>     |
| Low                                   | 230                           | 43.2%          | 14                   | 11.8%          | <b>&lt;0.001</b> |
| High                                  | 45                            | 8.4%           | 27                   | 22.7%          | <b>&lt;0.001</b> |
| Unknown                               | 11                            |                | 2                    |                |                  |
| Risk group (cytogenetic only)         |                               |                |                      |                |                  |
| Standard                              | 347                           | 65.6%          | 102                  | 86.4%          | <b>&lt;0.001</b> |
| Low                                   | 167                           | 31.6%          | 11                   | 9.3%           | <b>&lt;0.001</b> |
| High                                  | 15                            | 2.8%           | 5                    | 4.2%           | 0.387            |
| Unknown                               | 15                            |                | 3                    |                |                  |
| Response by End of Course 1           |                               |                |                      |                |                  |
| CR                                    | 463                           | 86.2%          | 47                   | 39.2%          | <b>&lt;0.001</b> |
| Partial remission (>5% - 15%)         | 46                            | 8.6%           | 31                   | 25.8%          | <b>&lt;0.001</b> |
| Persistent disease (>15%)             | 28                            | 5.2%           | 42                   | 35.0%          | <b>&lt;0.001</b> |
| CNS refractory (declared off therapy) | 0                             | 0.0%           | 0                    | 0.0%           | -                |
| Death                                 | 0                             | 0.0%           | 0                    | 0.0%           |                  |
| Not Evaluable                         | 7                             |                | 1                    |                |                  |
| Response by End of Course 2           |                               |                |                      |                |                  |
| CR                                    | 530                           | 98.1%          | 70                   | 59.3%          | <b>&lt;0.001</b> |
| Not CR                                | 10                            | 1.9%           | 48                   | 40.7%          |                  |
| Not Evaluable                         | 4                             |                | 3                    |                |                  |
| Age                                   |                               |                |                      |                |                  |
| Median (range)                        | 9.5                           | (0.005 - 23.5) | 10.6                 | (0.003 - 29.4) | 0.186            |
| WBC x10 <sup>3</sup> µL               |                               |                |                      |                |                  |
| Median (range)                        | 23.7                          | (0.5 - 827.2)  | 27.6                 | (1.0 - 446)    | 0.170            |
| BM Blasts %                           |                               |                |                      |                |                  |
| Median (range)                        | 65                            | (0 - 100)      | 71.1                 | (3 - 99)       | 0.206            |
| Protocol SCT received?                |                               |                |                      |                |                  |
| Yes                                   | 85                            | 15.6%          | 22                   | 18.2%          | 0.489            |
| No                                    | 459                           | 84.4%          | 99                   | 81.8%          |                  |

**Supplemental Table 3.** Information of patients who received bone marrow transplant with or without MRD at EO11 and EO12

| <b>All patients</b>        | <b>N (total patients)</b> | <b>N (patients who received BMT)</b> | <b>% of patients with BMT</b> |
|----------------------------|---------------------------|--------------------------------------|-------------------------------|
| MRD- at EO11, MRD- at EO12 | 401                       | 56                                   | 11                            |
| MRD+ at EO11, MRD- at EO12 | 65                        | 19                                   | 29                            |
| MRD+ at EO11, MRD+ at EO12 | 57                        | 18                                   | 32                            |

| <b>Standard risk only</b>  | <b>N (total patients)</b> | <b>N (patients who received BMT)</b> | <b>% of patients with BMT</b> |
|----------------------------|---------------------------|--------------------------------------|-------------------------------|
| MRD- at EO11, MRD- at EO12 | 182                       | 29                                   | 16                            |
| MRD+ at EO11, MRD- at EO12 | 35                        | 10                                   | 29                            |
| MRD+ at EO11, MRD+ at EO12 | 38                        | 9                                    | 24                            |

**Supplemental Figure 1. 5-year TRM subdivided by EO11 leukemia burden.** The correlation of 5-year TRM and the amount of MRD at EO11 was shown.

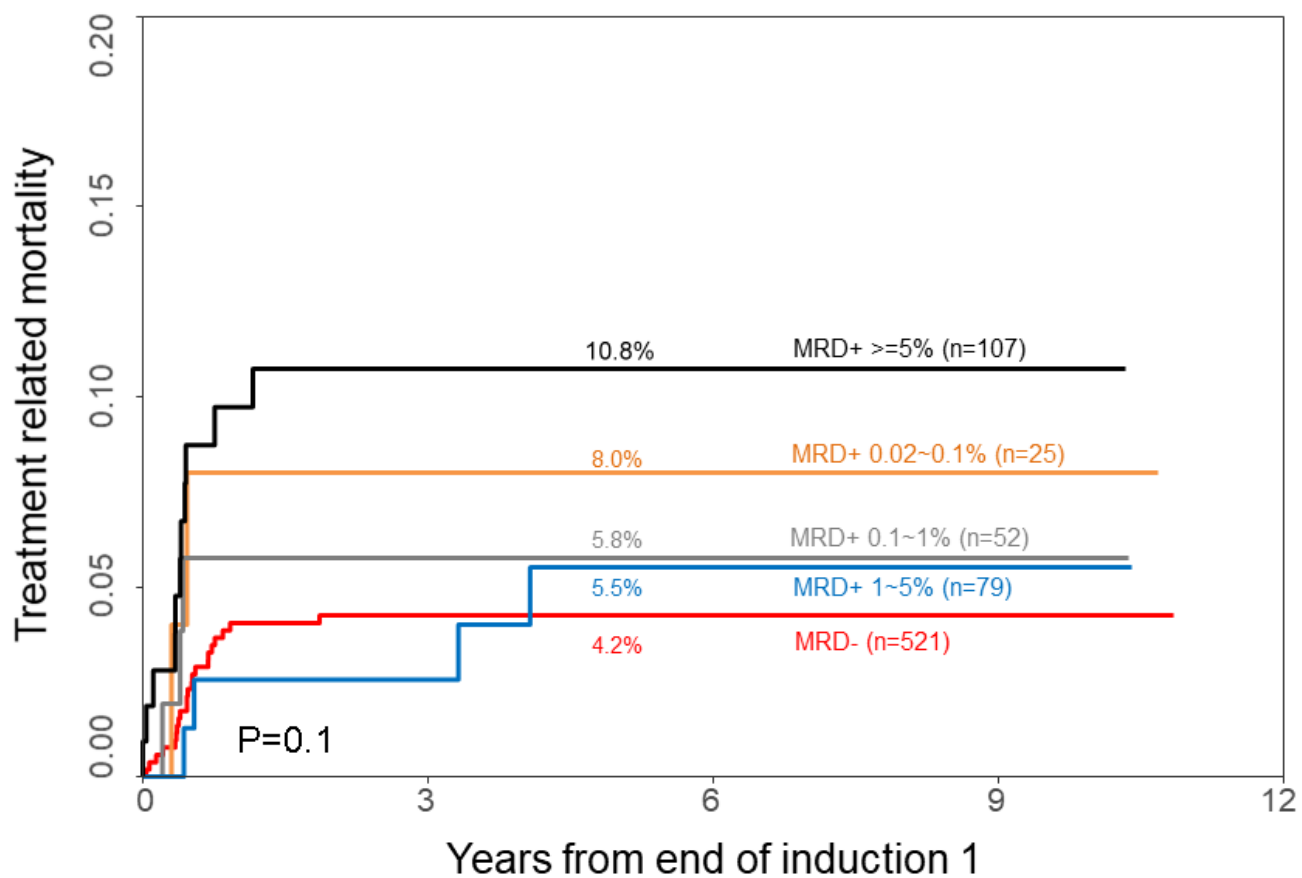

Supplement: advancesADV2020002070-suppl1.pdf [file advancesADV2020002070-suppl1.pdf]
